# Supplementary material for: Growth Arrest Specific 1 (Gas1) Gene Overexpression in Liver Reduces the In Vivo Progression of Murine Hepatocellular Carcinoma and Partially Restores Gene Expression Levels
Source: PubMed Central journal article supplement (PMC4498802; doi:10.1371/journal.pone.0132477), 2015-07-10

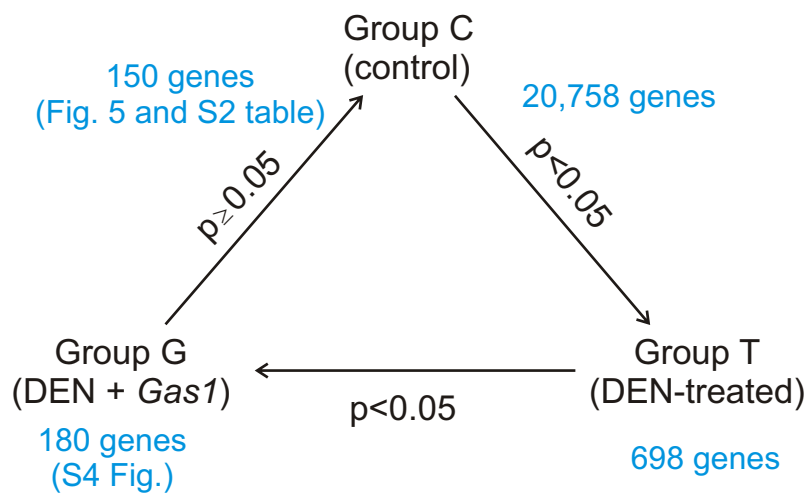

Supplement: pone.0132477.s005.pdf [file pone.0132477.s005.pdf]
